# Supplementary material for: Efficacy and Safety of Epoetin Alfa in Critically Ill Patients
Source: Atypon-hosted journal article supplement (doi:10.1056/nejmoa071533), 2007-09-05
Supplement: nejm_corwin_965sa1.pdf [file nejm_corwin_965sa1.pdf]

## Supplementary Appendix

This appendix has been provided by the authors to give readers additional information about their work.

Supplement to: Corwin HL, Gettinger A, Fabian TC, et al. Efficacy and safety of epoetin alfa in critically ill patients. *N Engl J Med* 2007;357:965-76.

## Supplementary Appendix

The following describes the calculation of the test statistics (inverse variance), and the p value was from normal approximation:

Let's define the following:

S1T, S1P: probability of survival for treatment and placebo, respectively for trauma subgroup;

E1T, E1P: standard errors (from Greenwood) for treatment and placebo, respectively for trauma subgroup;

S2T, S2P: probability of survival for treatment and placebo, respectively for medical subgroup;

E2T, E2P: standard errors for treatment and placebo, respectively for medical subgroup;

S3T, S3P: probability of survival for treatment and placebo, respectively for surgical subgroup;

E3T, E3P: standard errors for treatment and placebo, respectively for surgical subgroup;

Then:

$$Z = \frac{(S1T - S1P)/(E1T^2 + E1P^2) + (S2T - S2P)/(E2T^2 + E2P^2) + (S3T - S3P)/(E3T^2 + E3P^2)}{\sqrt{1/(E1T^2 + E1P^2) + 1/(E2T^2 + E2P^2) + 1/(E3T^2 + E3P^2)}}$$
